# Supplementary material for: Sensitivity analysis of the meteorological preprocessor MPP-FMI 3.0 using algorithmic differentiation
Source: Copernicus journal article supplement (doi:10.5194/gmd-10-3793-2017), 2017-10-17
Supplement: Supplementary file 1 [file gmd-10-3793-2017-supplement.zip]

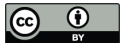

## *Supplement of*

# **Sensitivity analysis of the meteorological preprocessor MPP-FMI 3.0 using algorithmic differentiation**

**John Backman et al.**

*Correspondence to:* John Backman ([john.backman@fmi.fi](mailto:john.backman@fmi.fi))

- `gmd-10-3793-2017-supplement-title-page.pdf`
- `README.TXT`
- `evuot.f95`
- `input`
  - `make_input_data.py`
- `mpp-fmi-ad`
  - `LICENSE`
  - `Makefile`
  - `clrad_dv.f95`
  - `diffsizes.f95`
  - `do_evuot_dv.f95`
  - `dp11_dv.f95`
  - `dp1s_dv.f95`
  - `evuot_dv-all.f95`
  - `salfa_dv.f95`
  - `save_data.f95`
  - `variables.f95`
  - `wrapper.f95`
- `output`
- `output_ws`

The copyright of individual parts of the supplement might differ from the CC BY 3.0 License.
